# Supplementary material for: The evaluation of a newly developed antigen test (QuickNavi™-COVID19 Ag) for SARS-CoV-2: A prospective observational study in Japan
Source: bioRxiv or medRxiv preprint supplement (doi:10.1101/2020.12.27.20248876), 2021-01-03
Supplement: Supplementary file [file media-2.pdf]

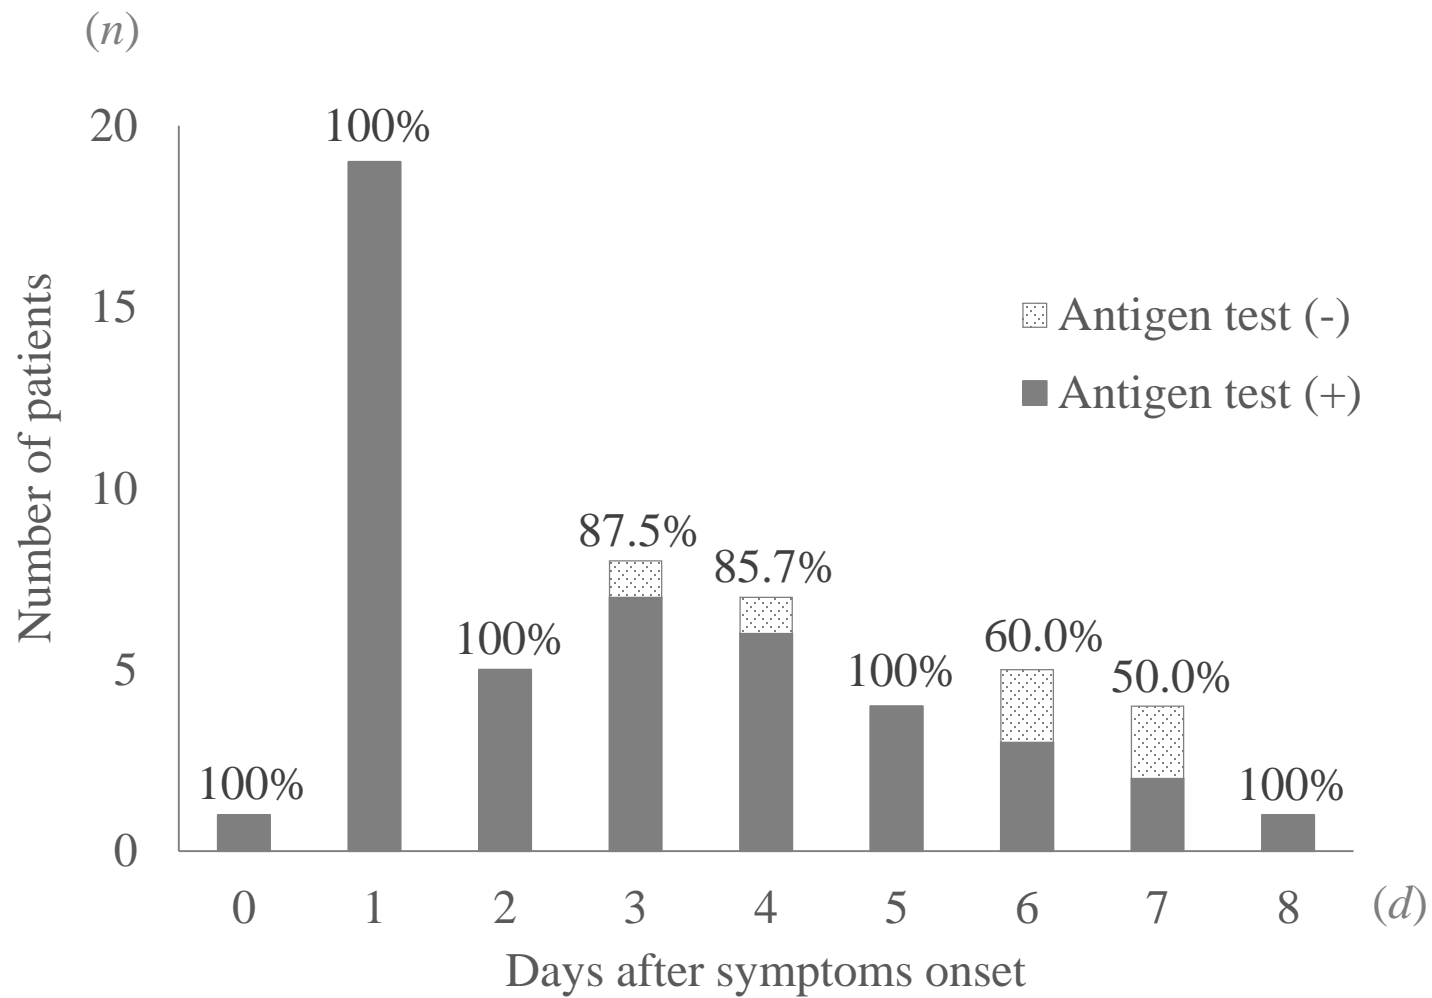

Supplementary Figure 2. Differences in the sensitivity of antigen test stratified by the duration since symptom onset
